# Supplementary figures and images for: Why does the presence of silicon atoms improve the emission properties of biphenyl derivatives? – Verification of various hypotheses by experiment and theory
Source: Royal Society of Chemistry journal article supplement (doi:10.1039/c9cp03749g), 2019-01-01

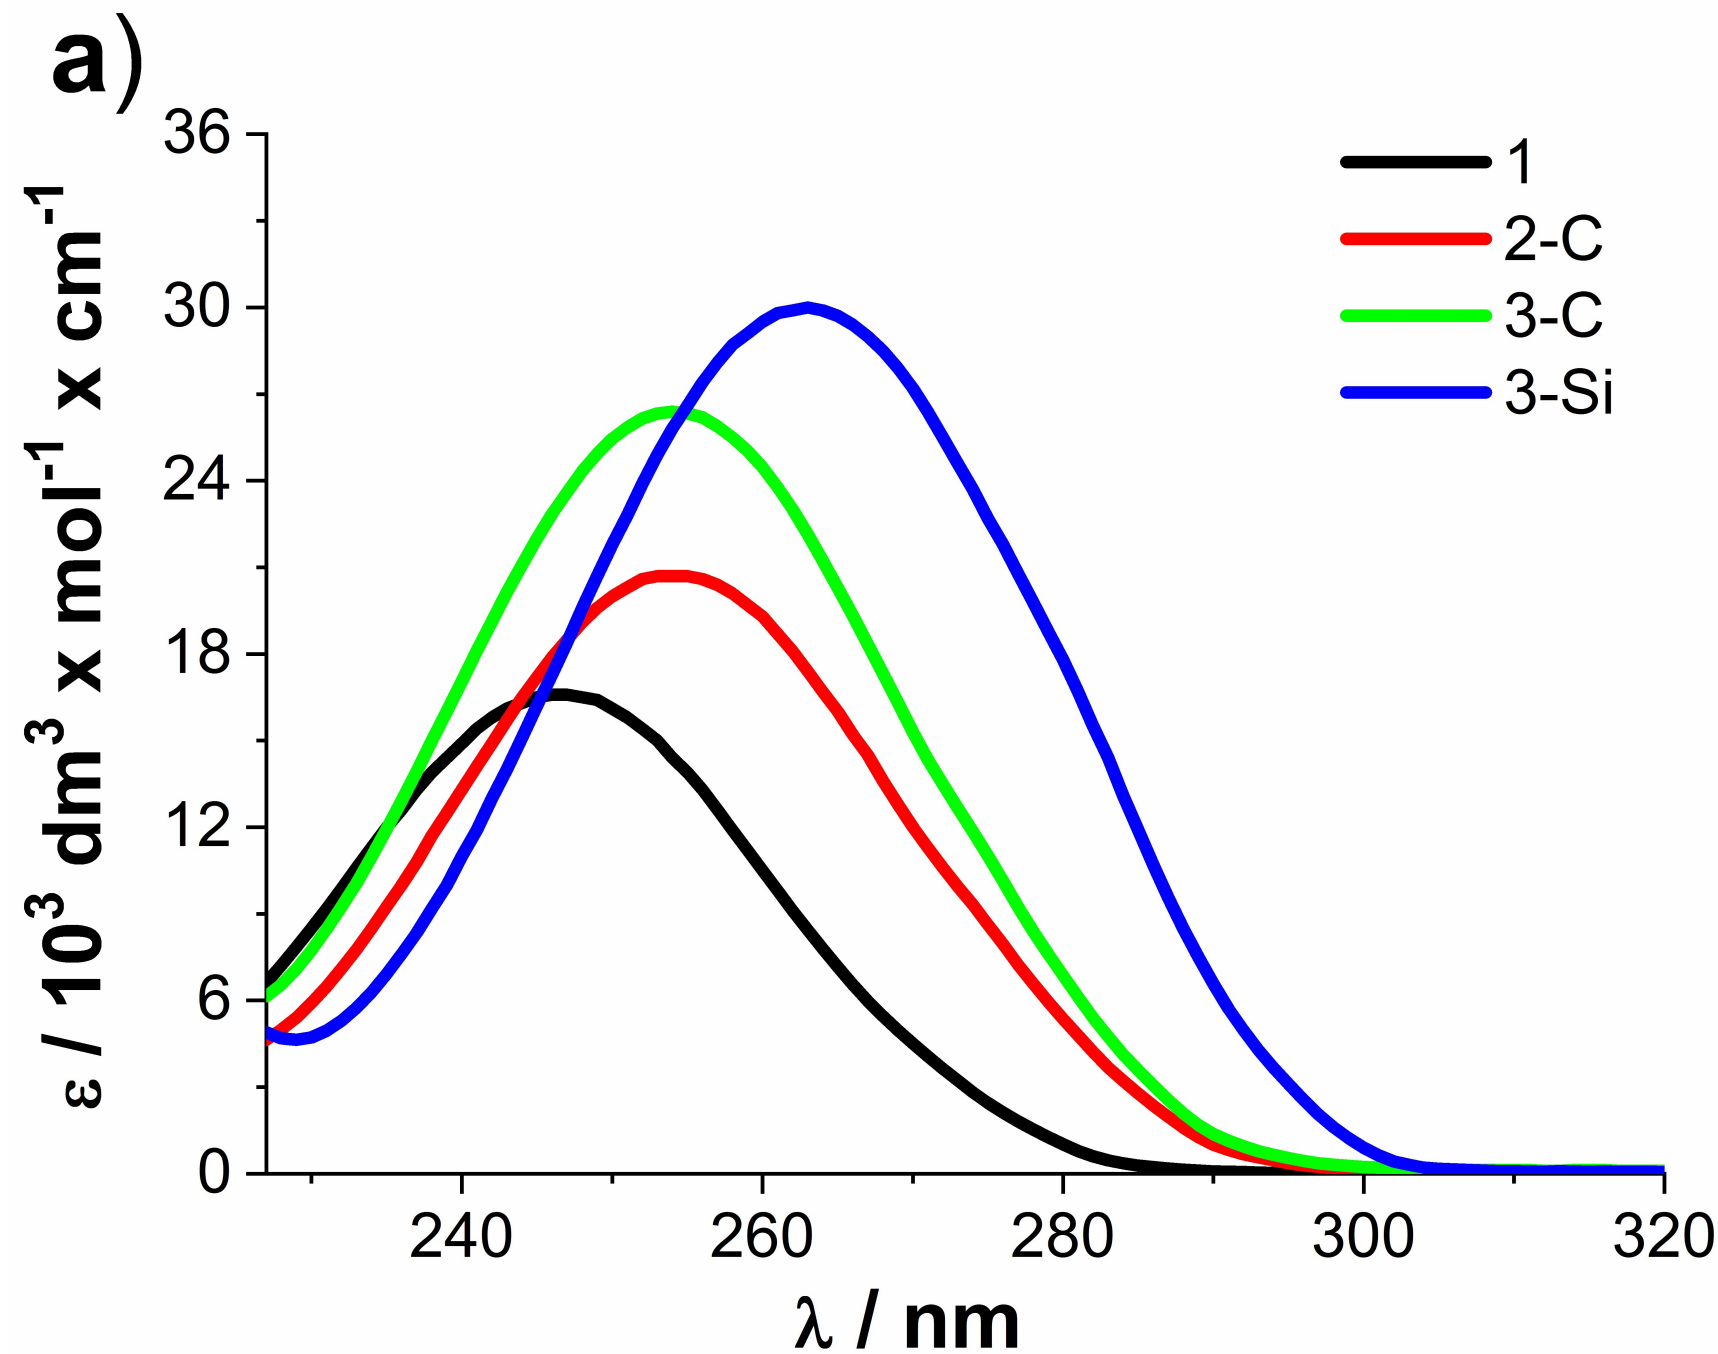

Supplement: c9cp03749g1.pdf [file c9cp03749g1.pdf]

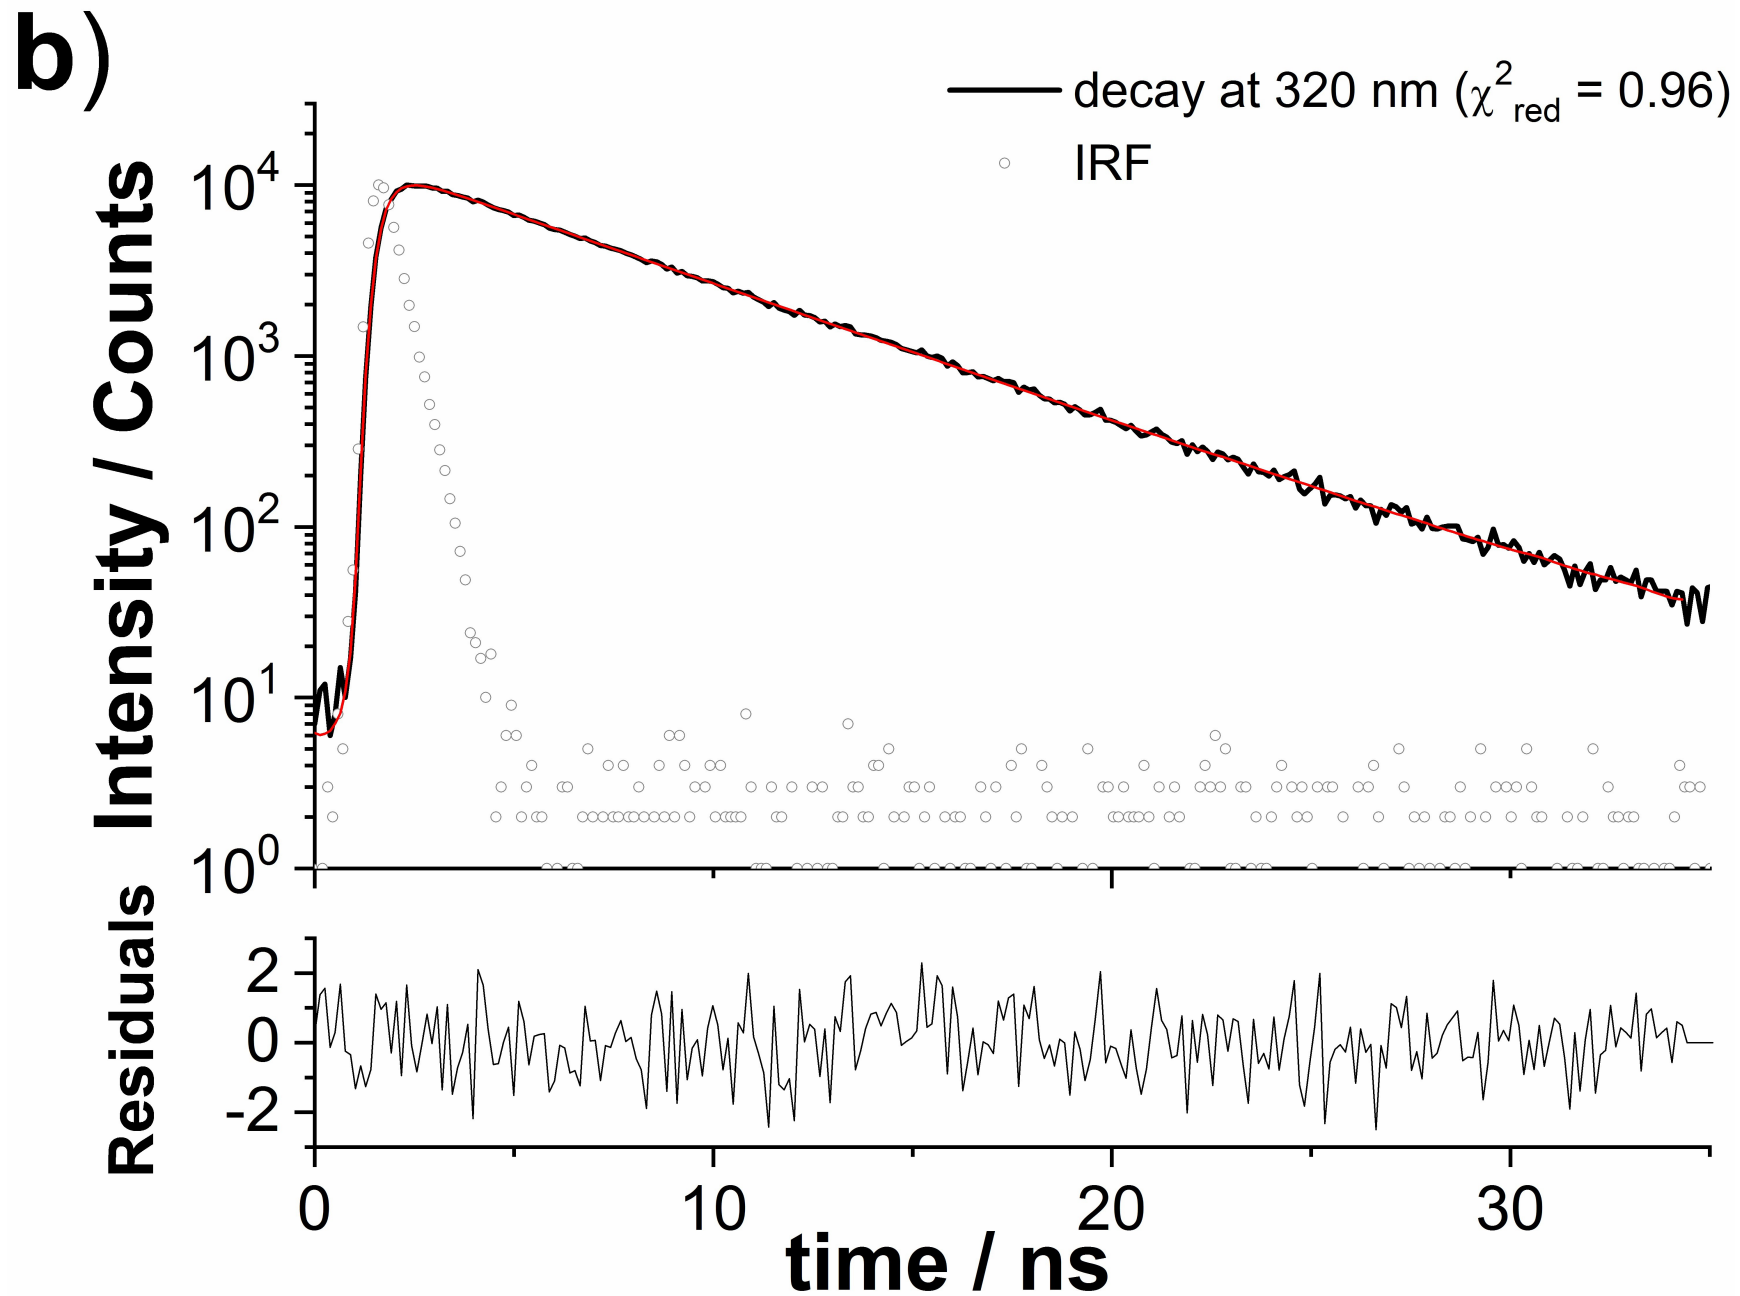

Supplement: c9cp03749g10.pdf [file c9cp03749g10.pdf]

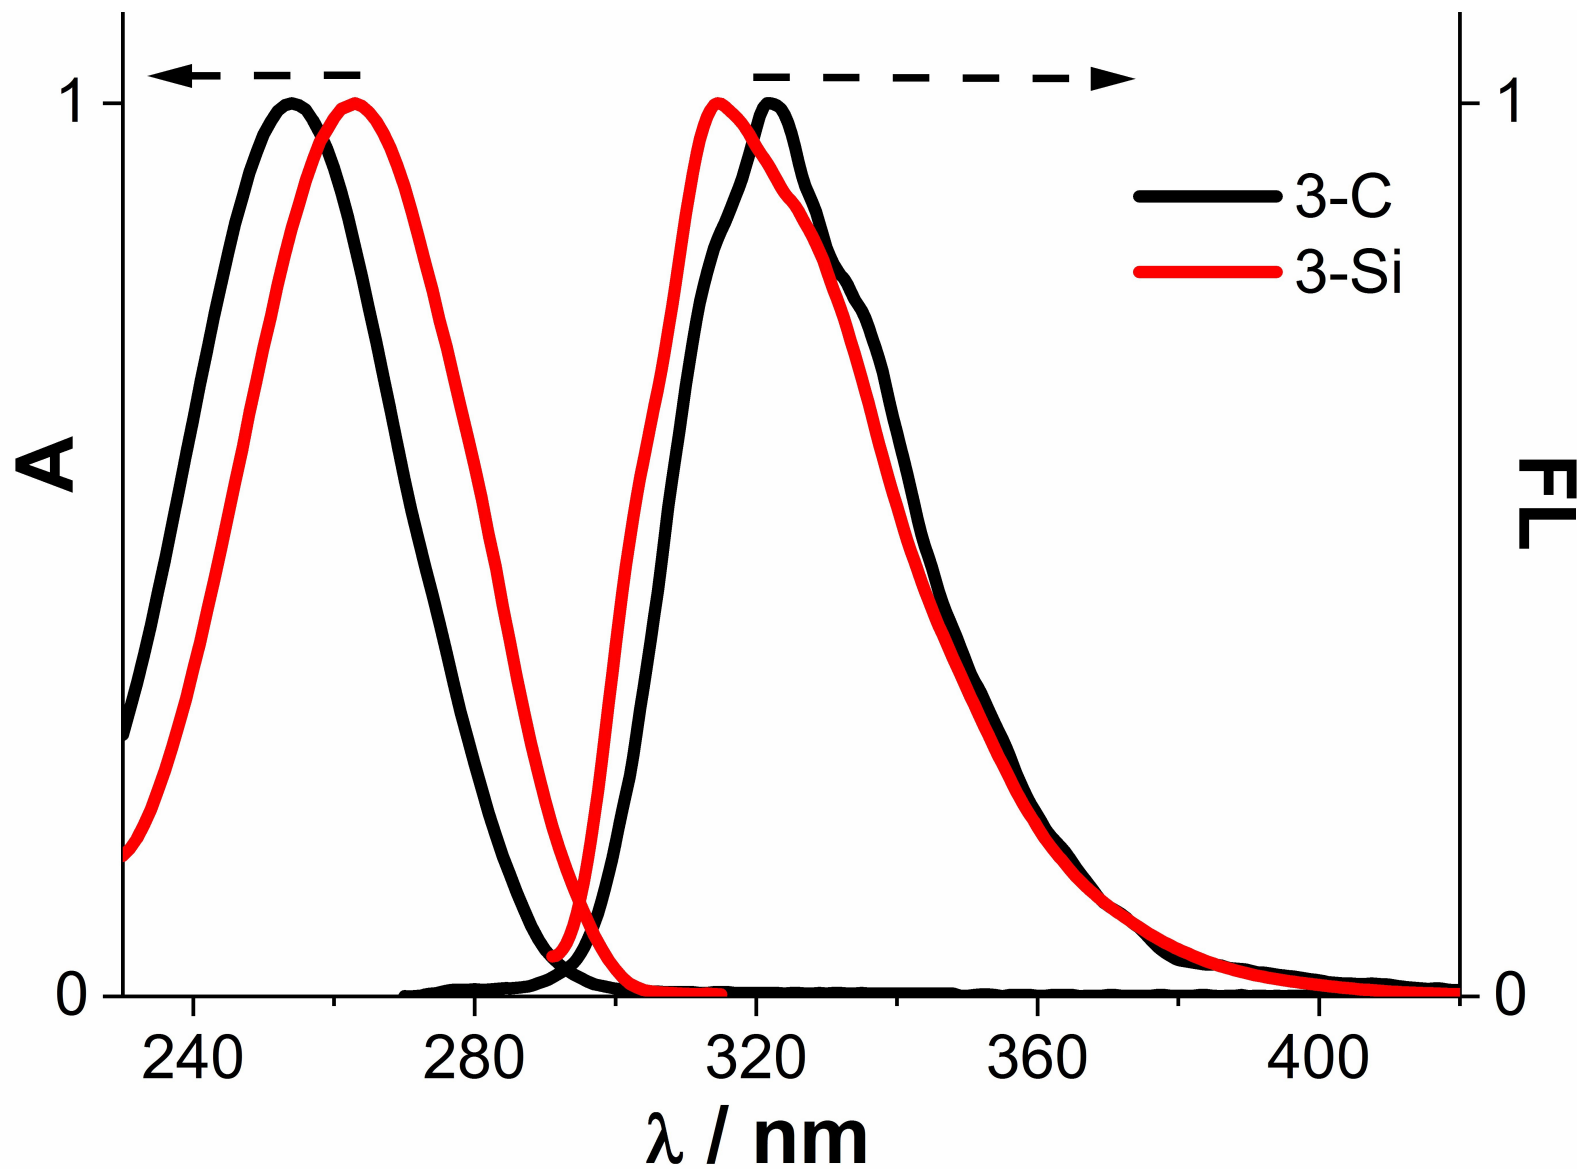

Supplement: c9cp03749g11.pdf [file c9cp03749g11.pdf]

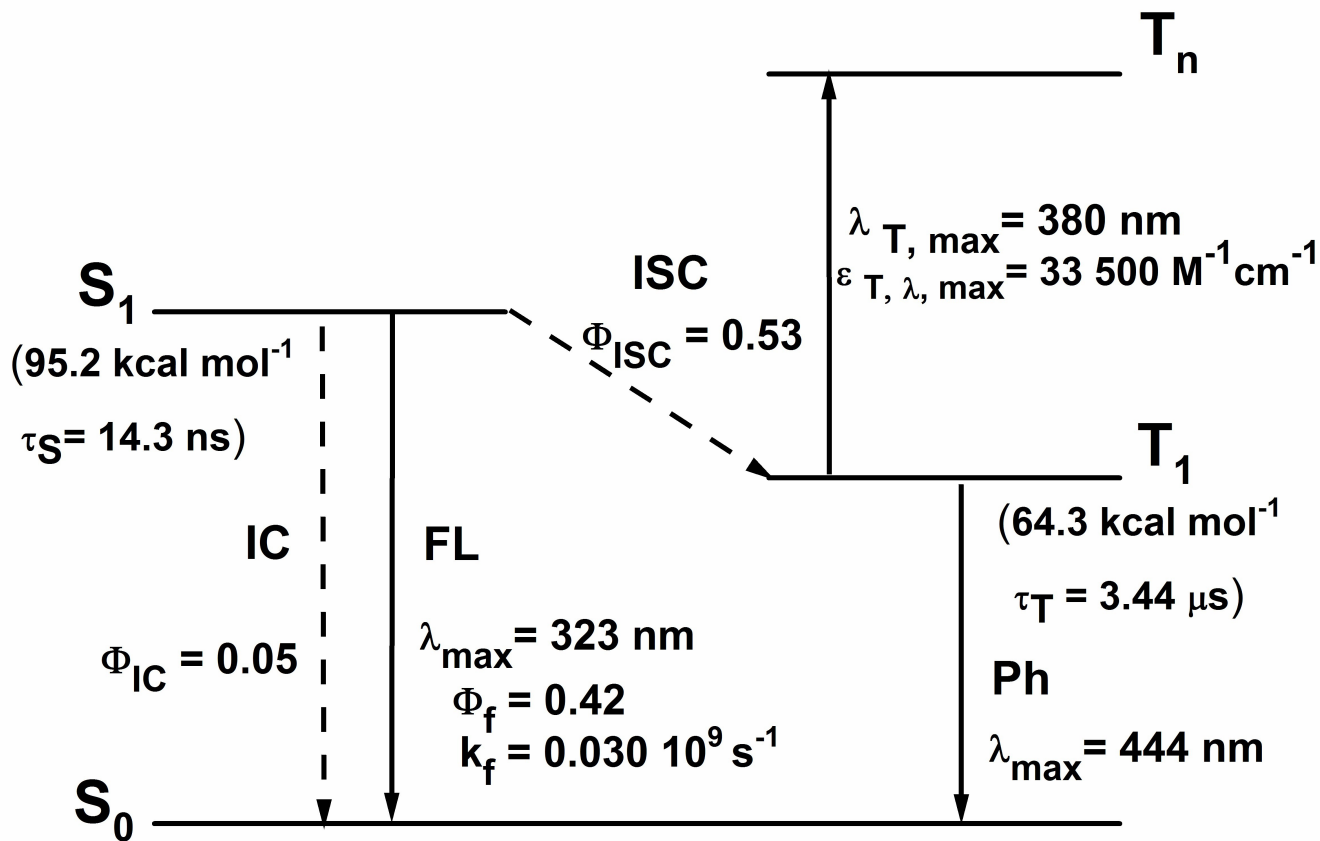

Supplement: c9cp03749g12.pdf [file c9cp03749g12.pdf]

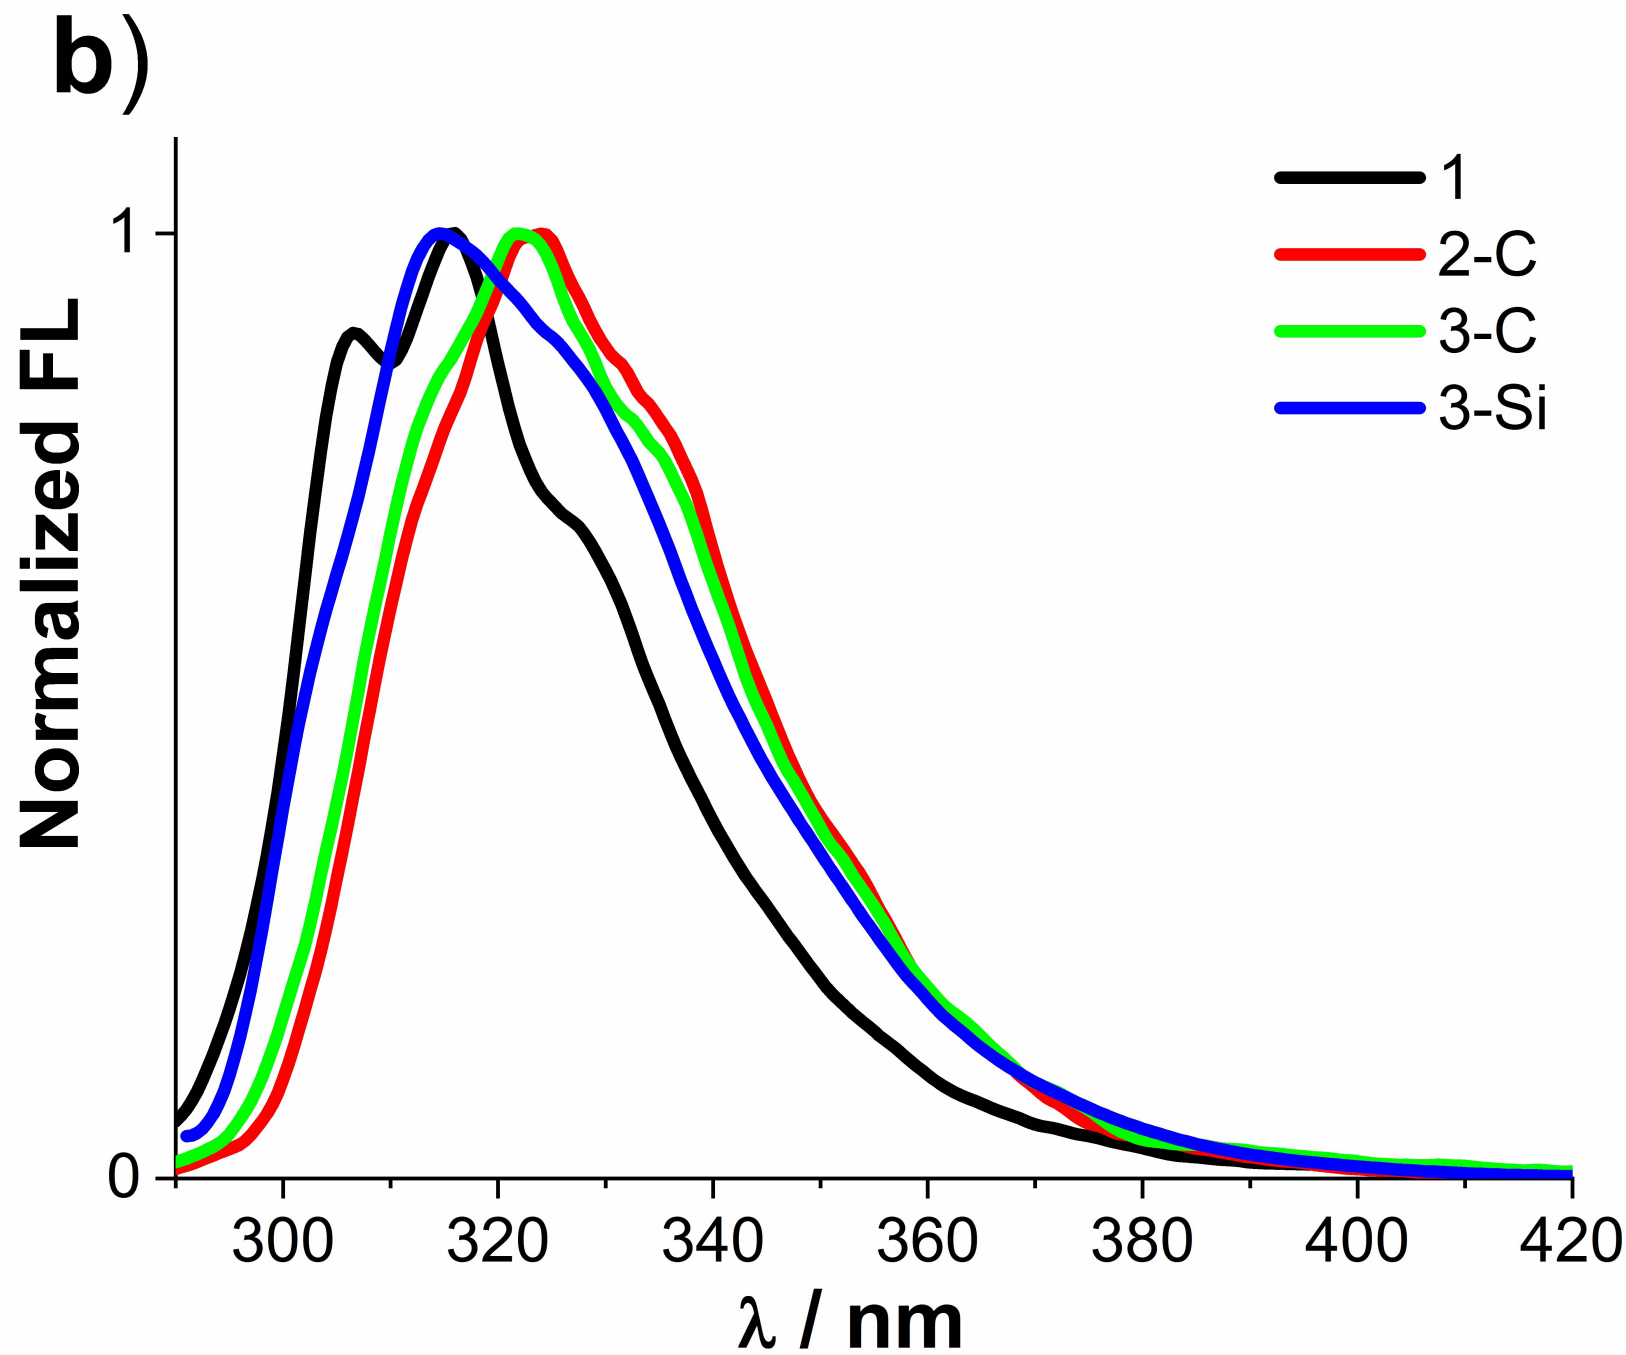

Supplement: c9cp03749g2.pdf [file c9cp03749g2.pdf]

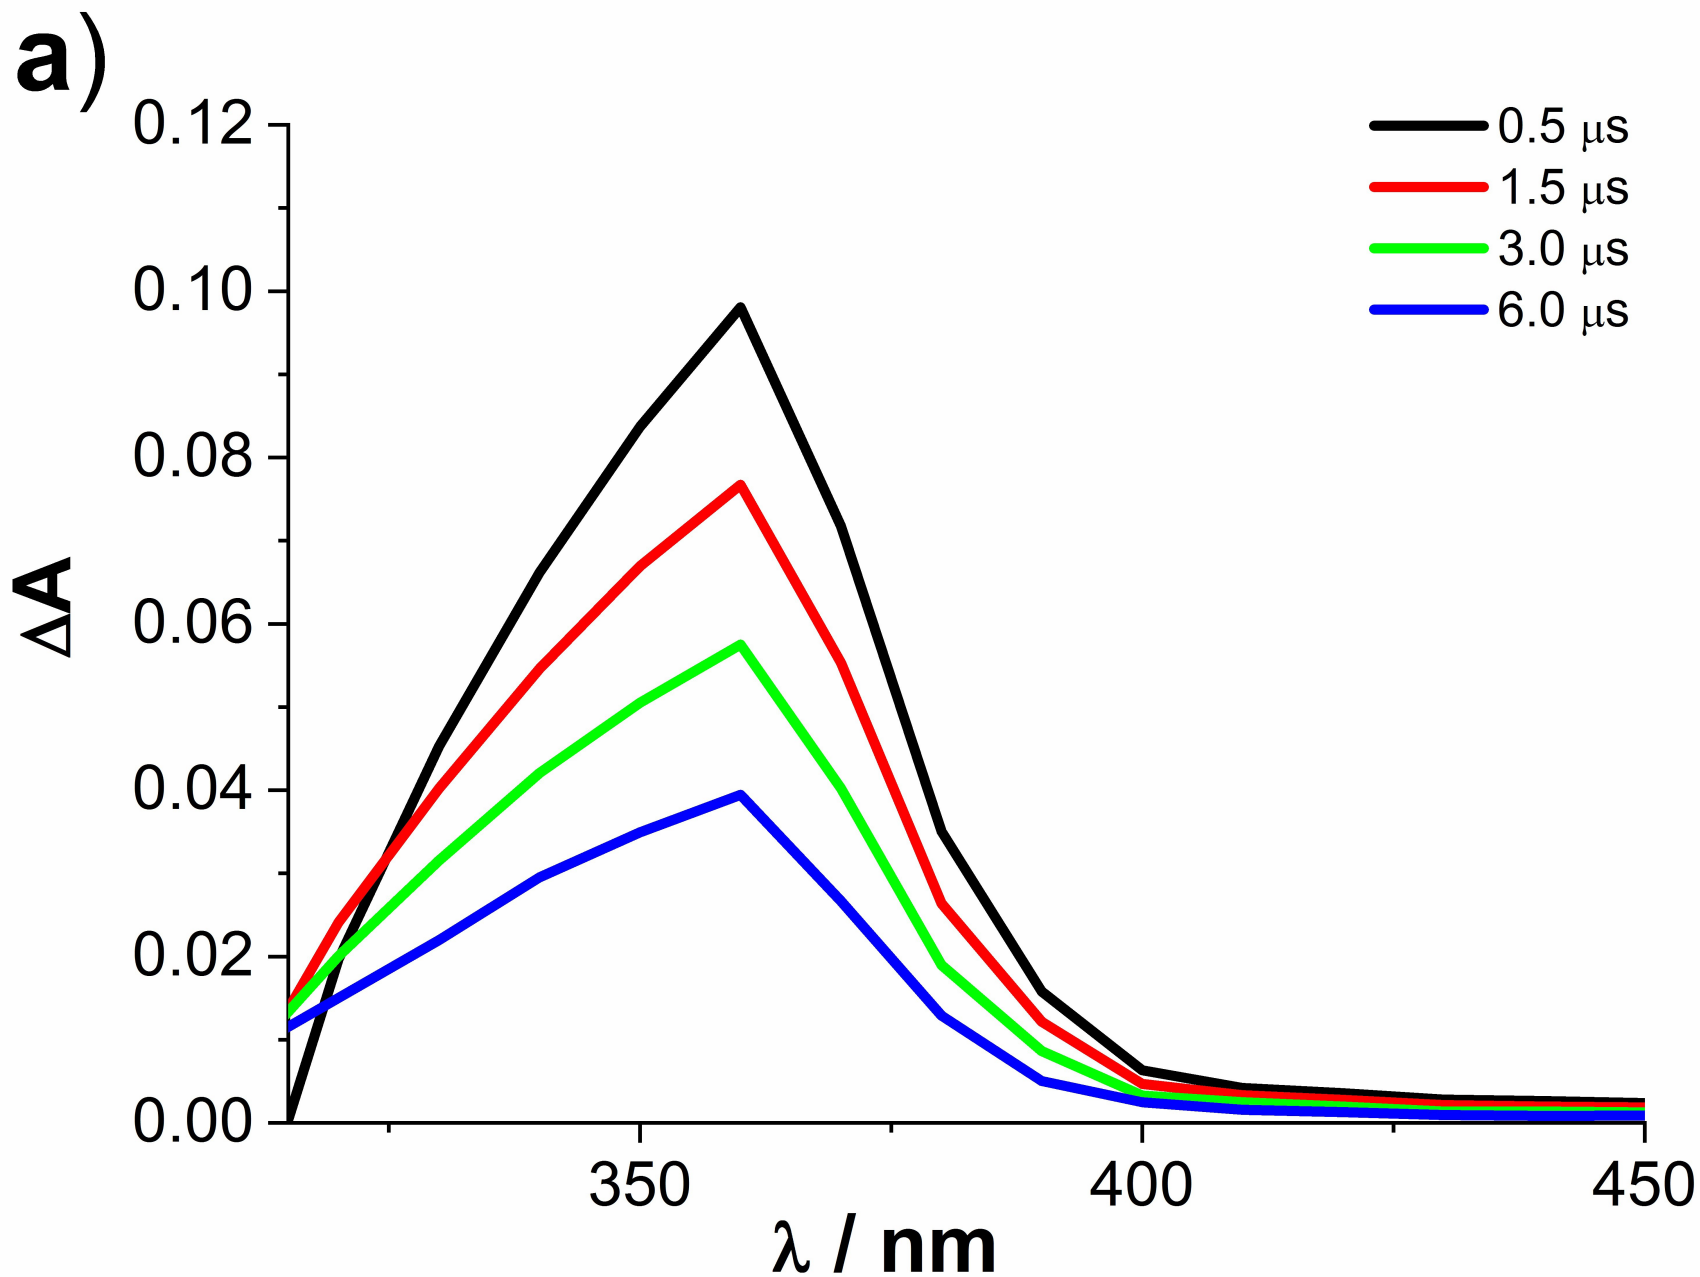

Supplement: c9cp03749g3.pdf [file c9cp03749g3.pdf]

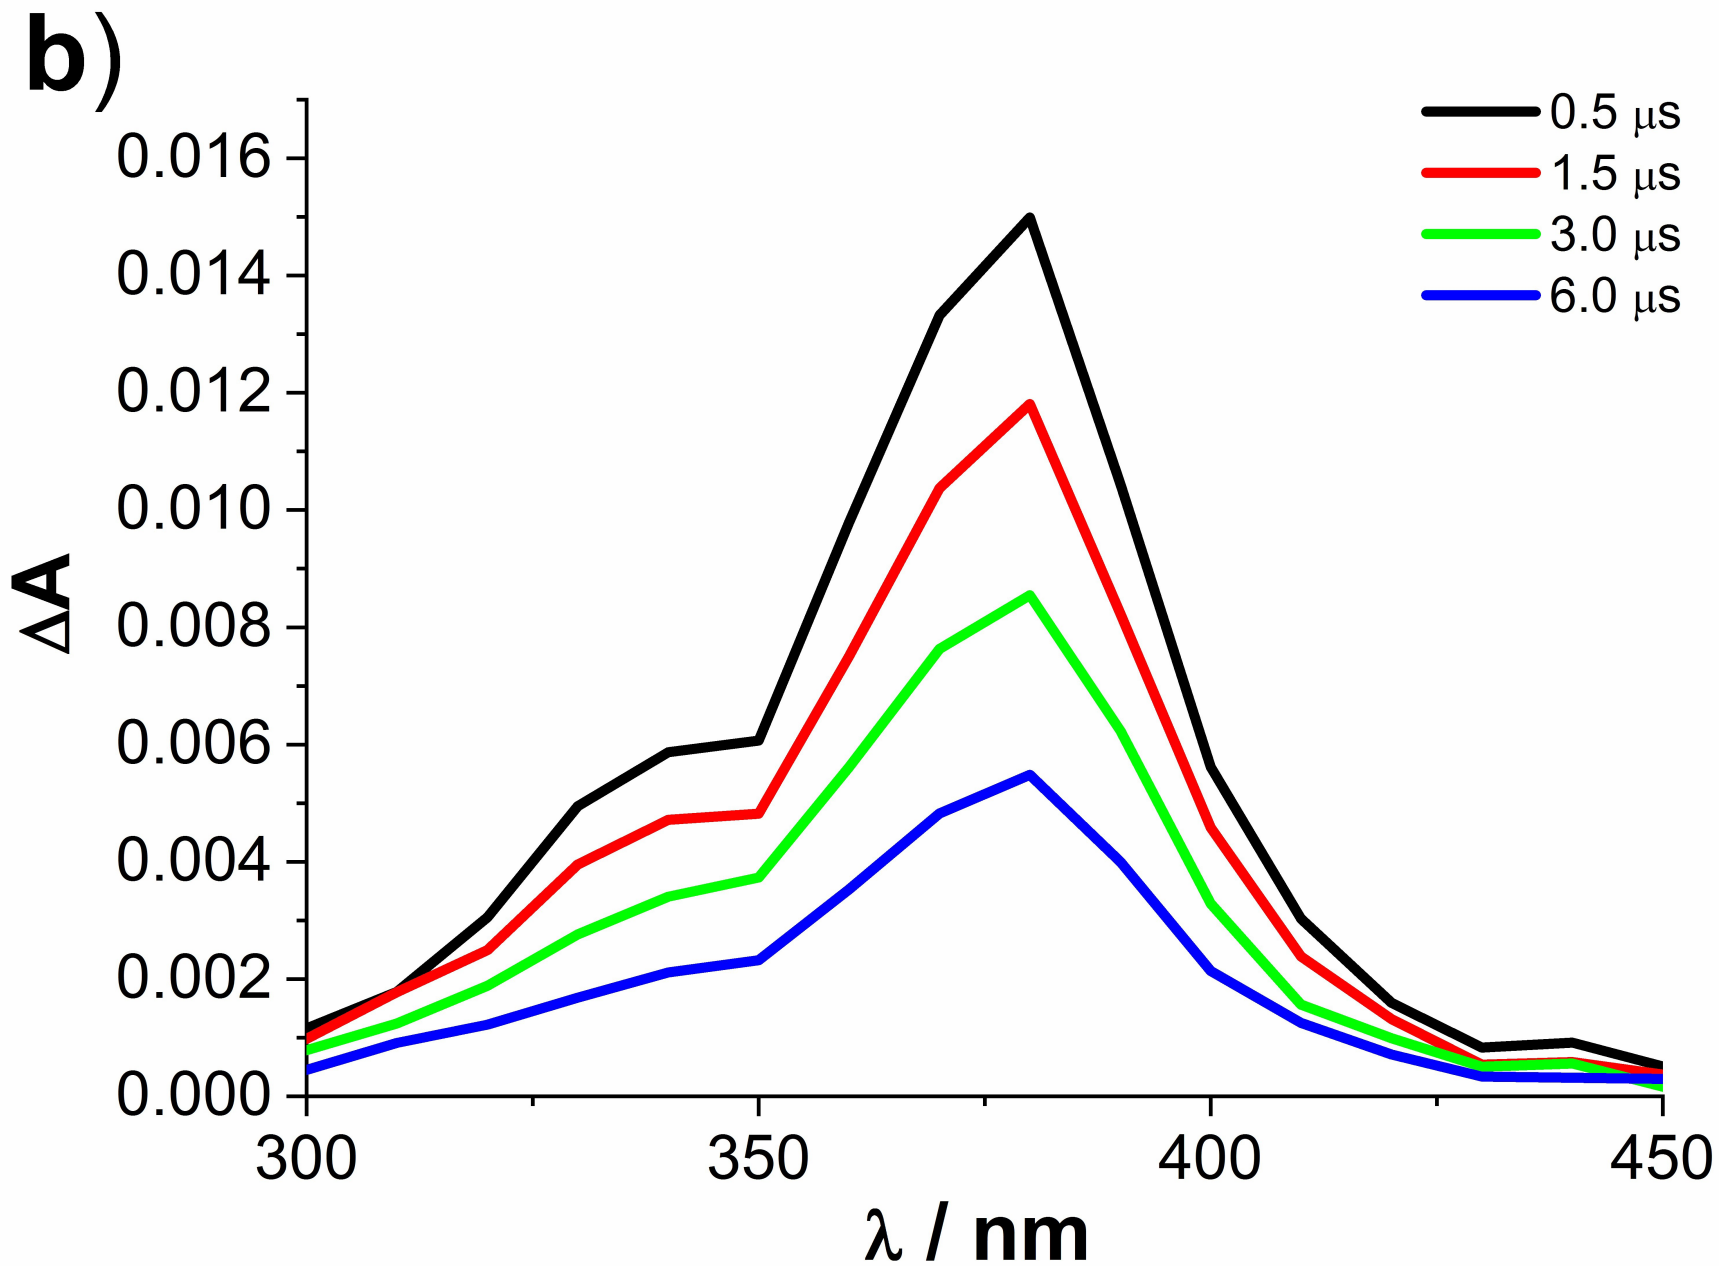

Supplement: c9cp03749g4.pdf [file c9cp03749g4.pdf]

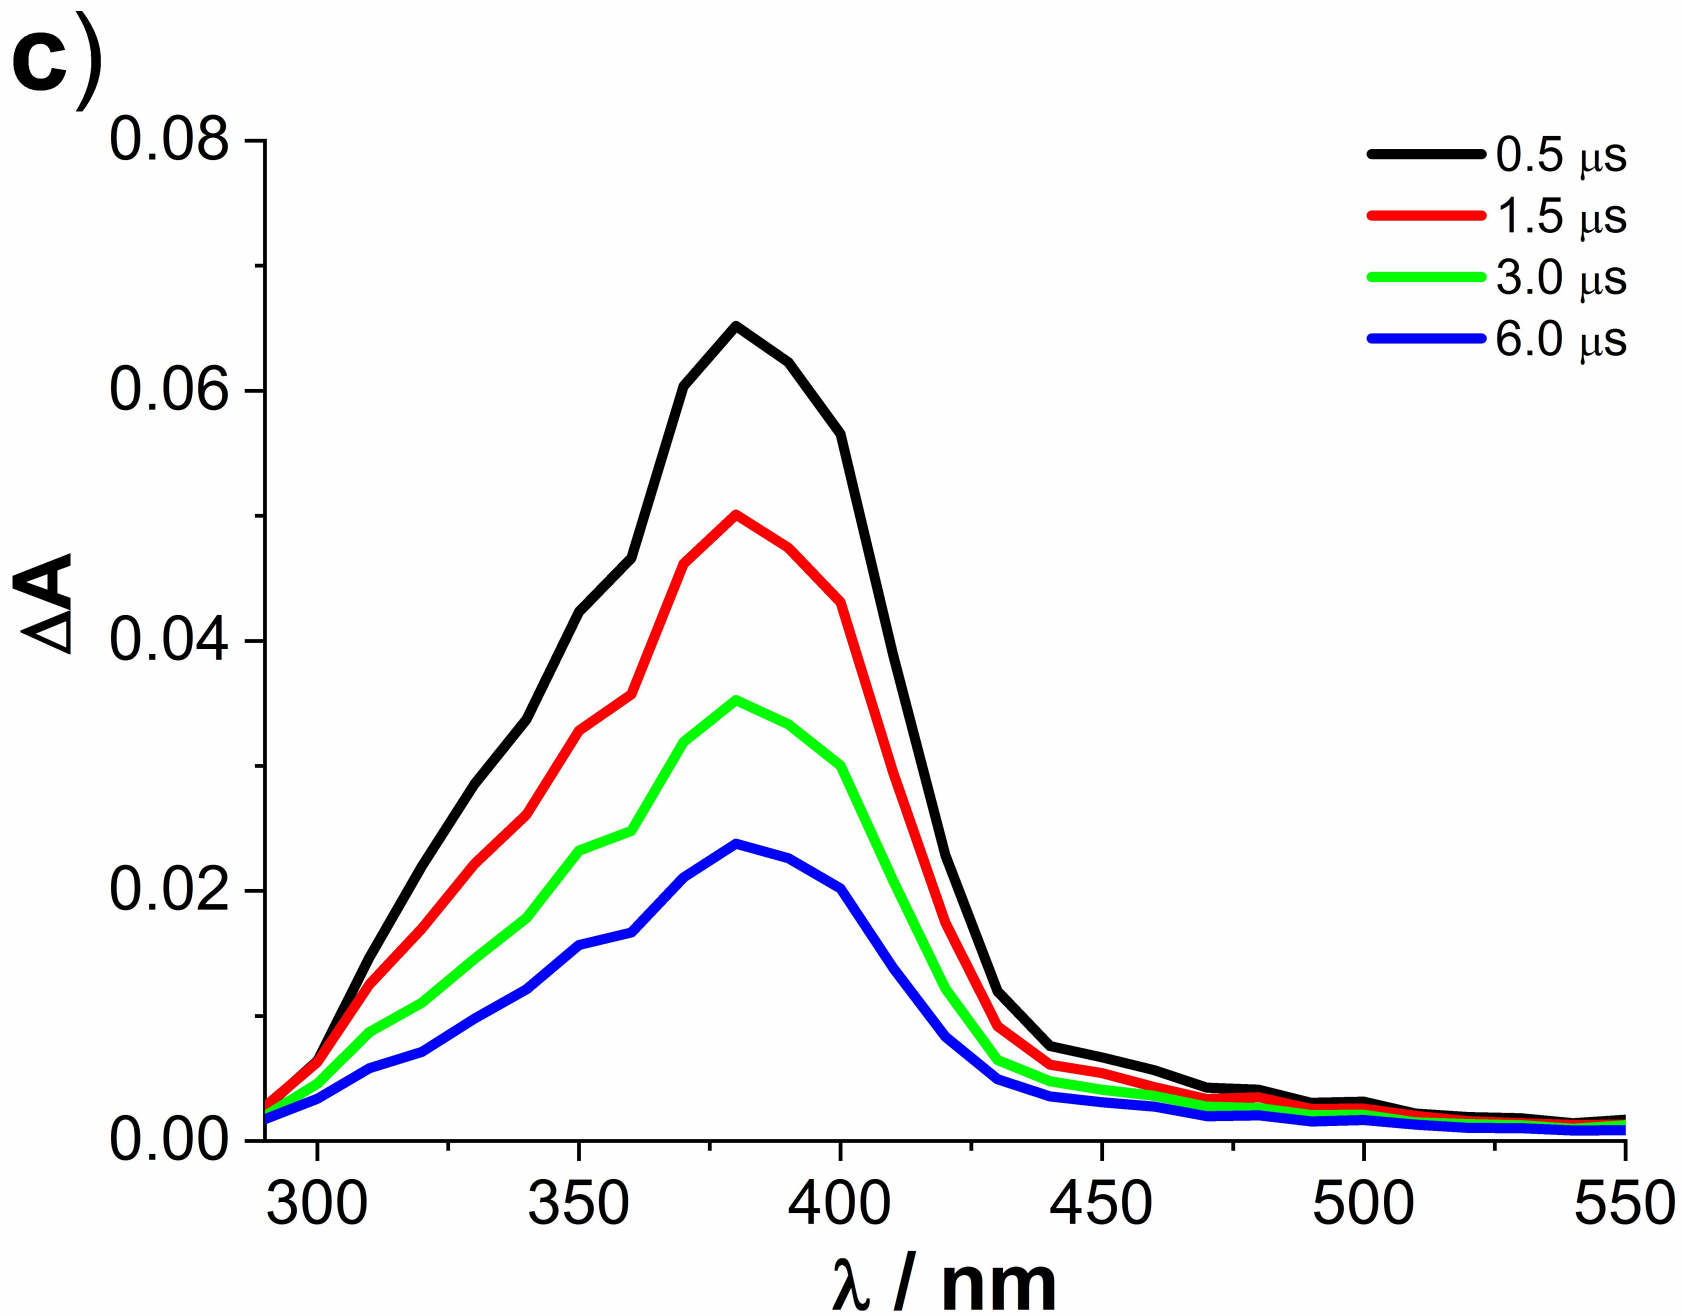

Supplement: c9cp03749g5.pdf [file c9cp03749g5.pdf]

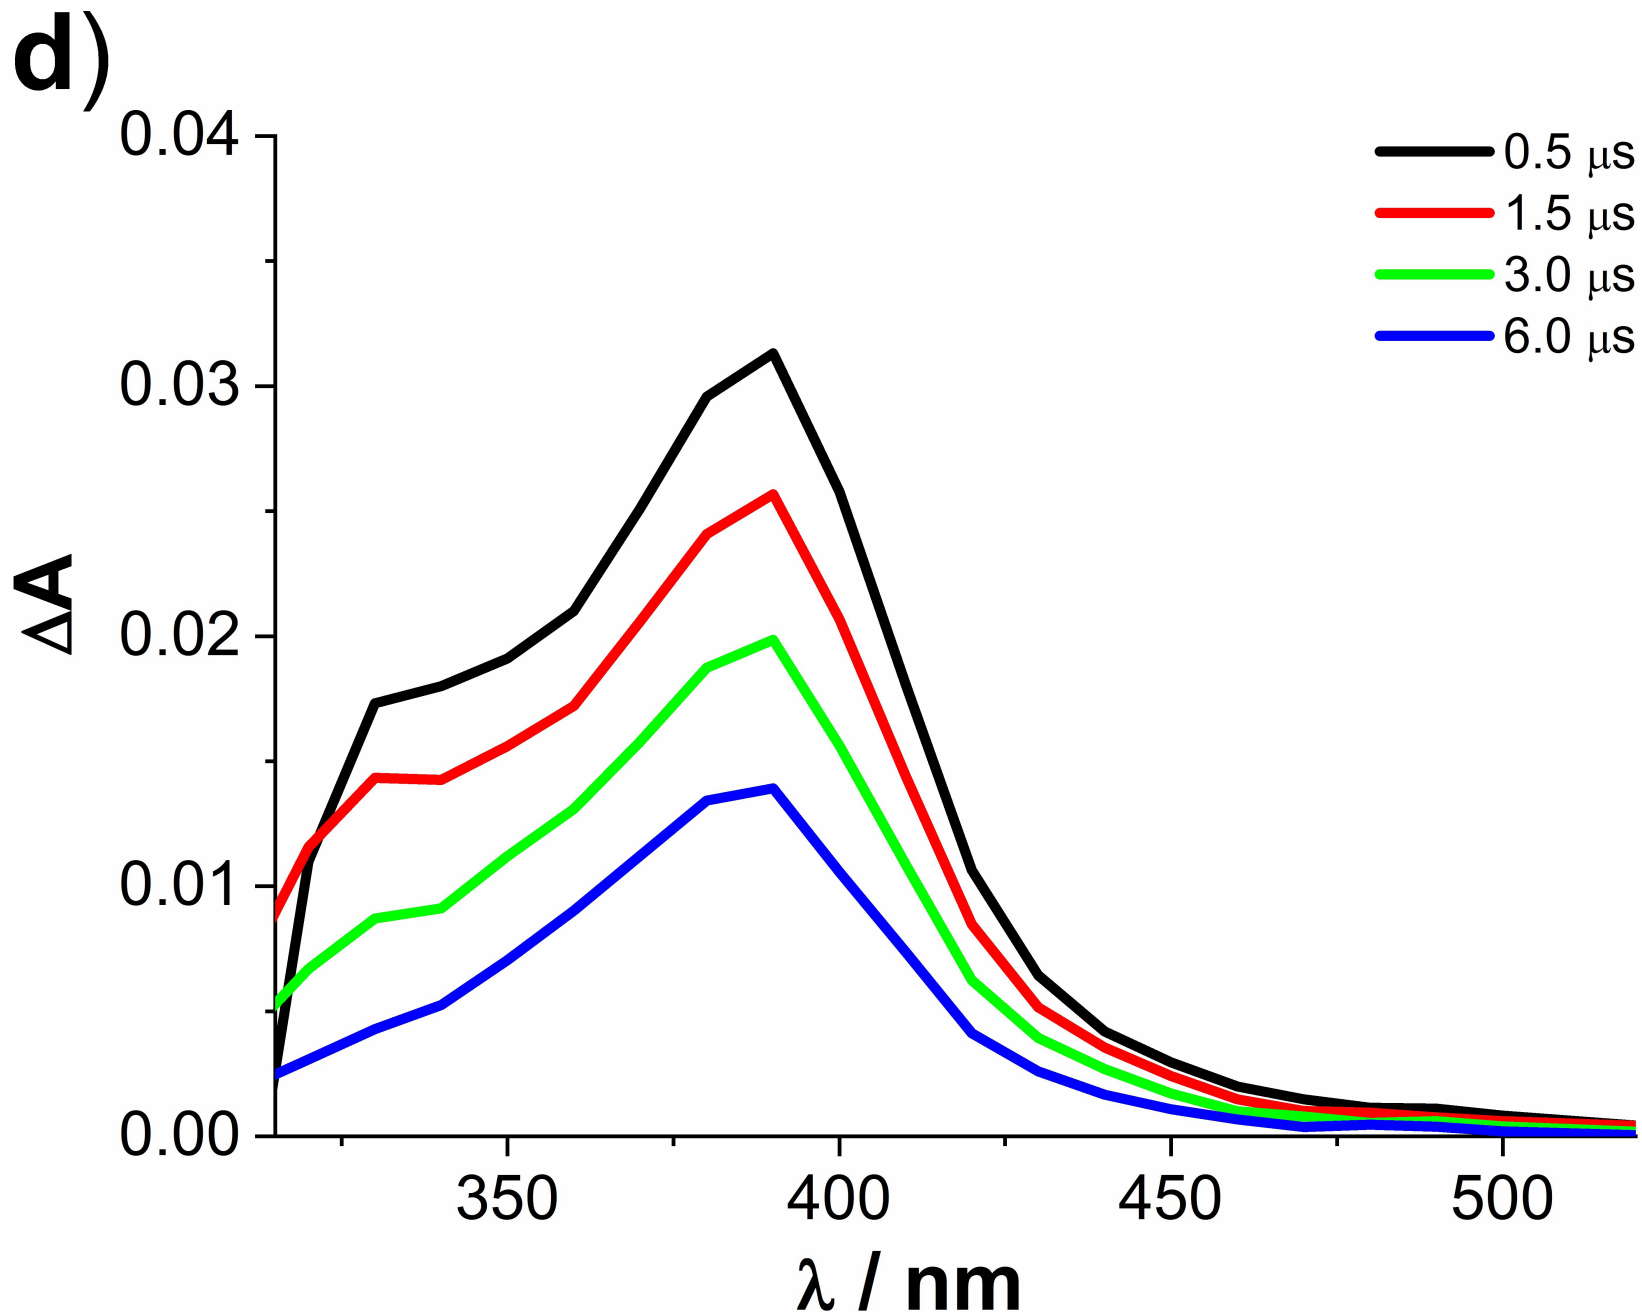

Supplement: c9cp03749g6.pdf [file c9cp03749g6.pdf]

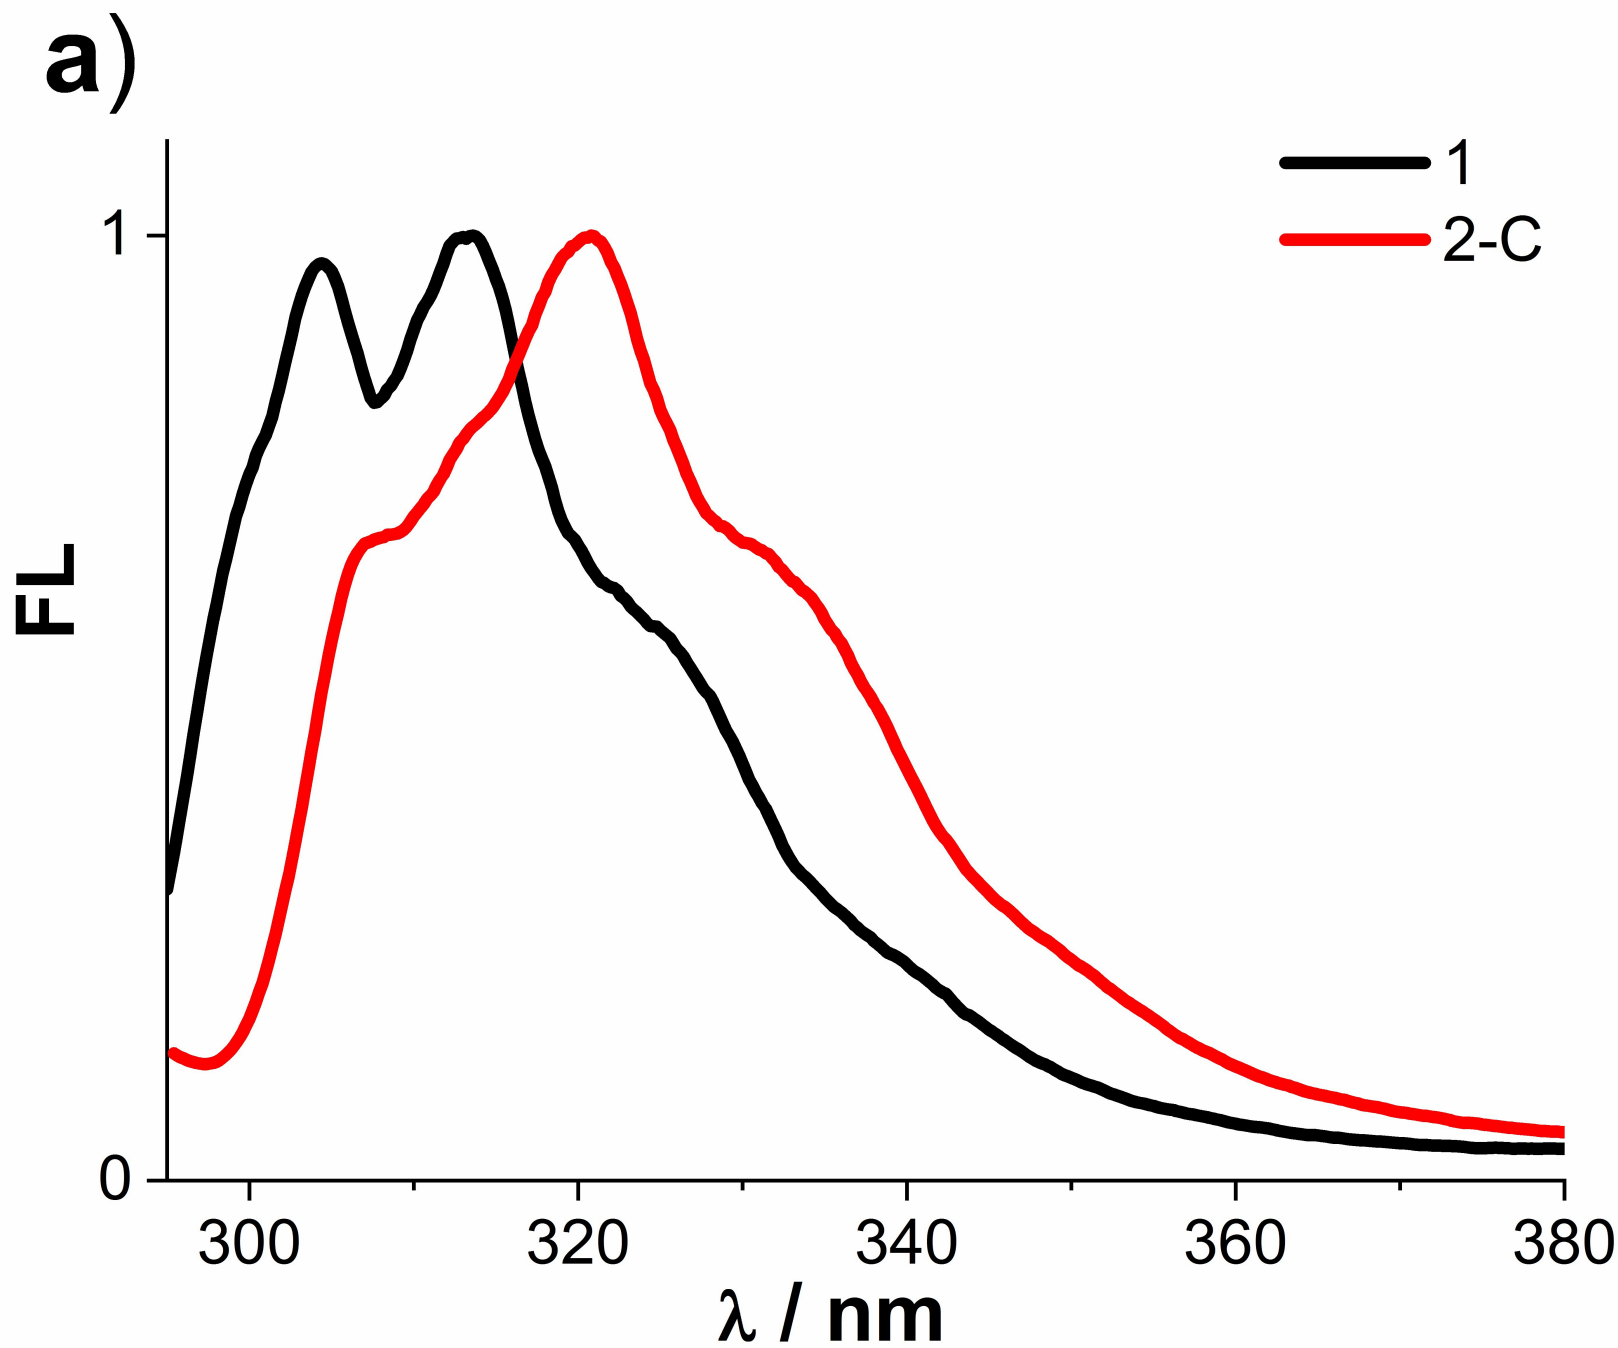

Supplement: c9cp03749g7.pdf [file c9cp03749g7.pdf]

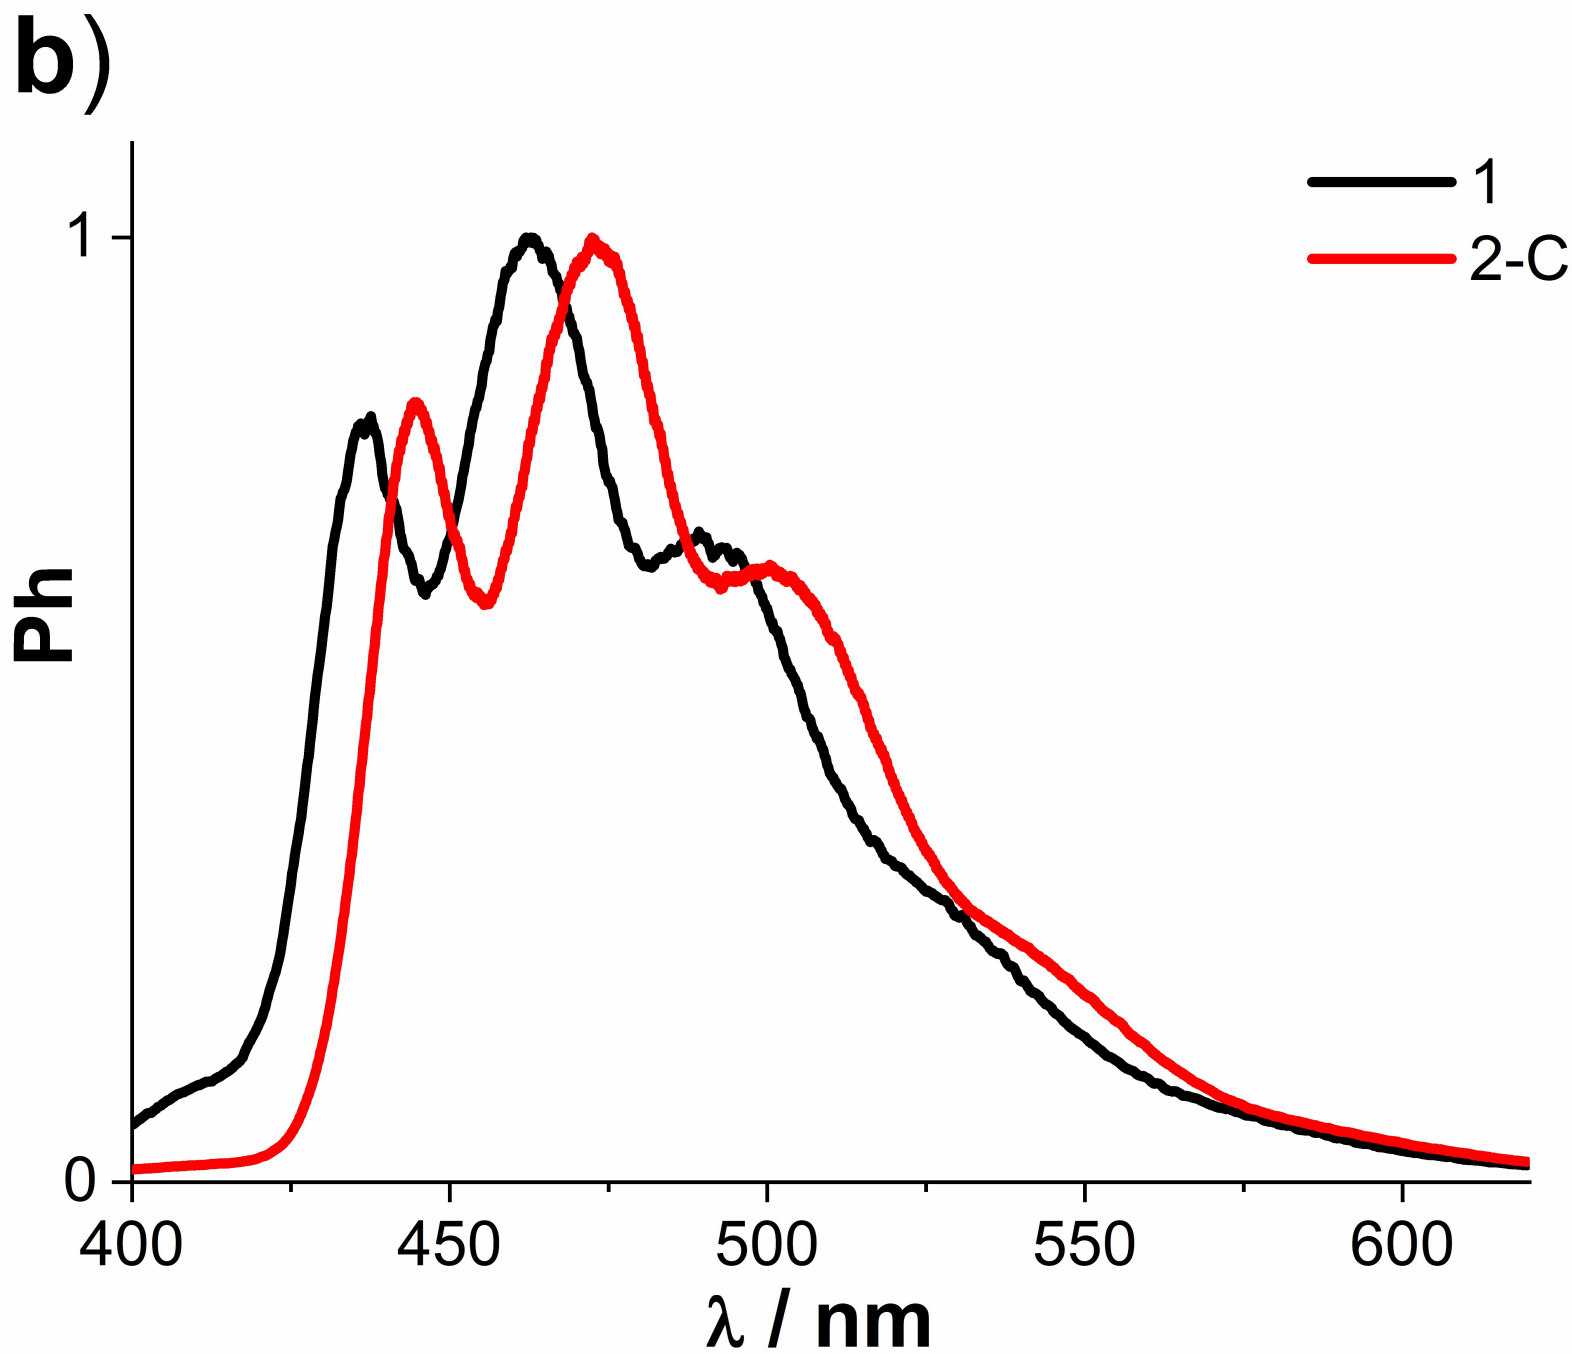

Supplement: c9cp03749g8.pdf [file c9cp03749g8.pdf]

a)

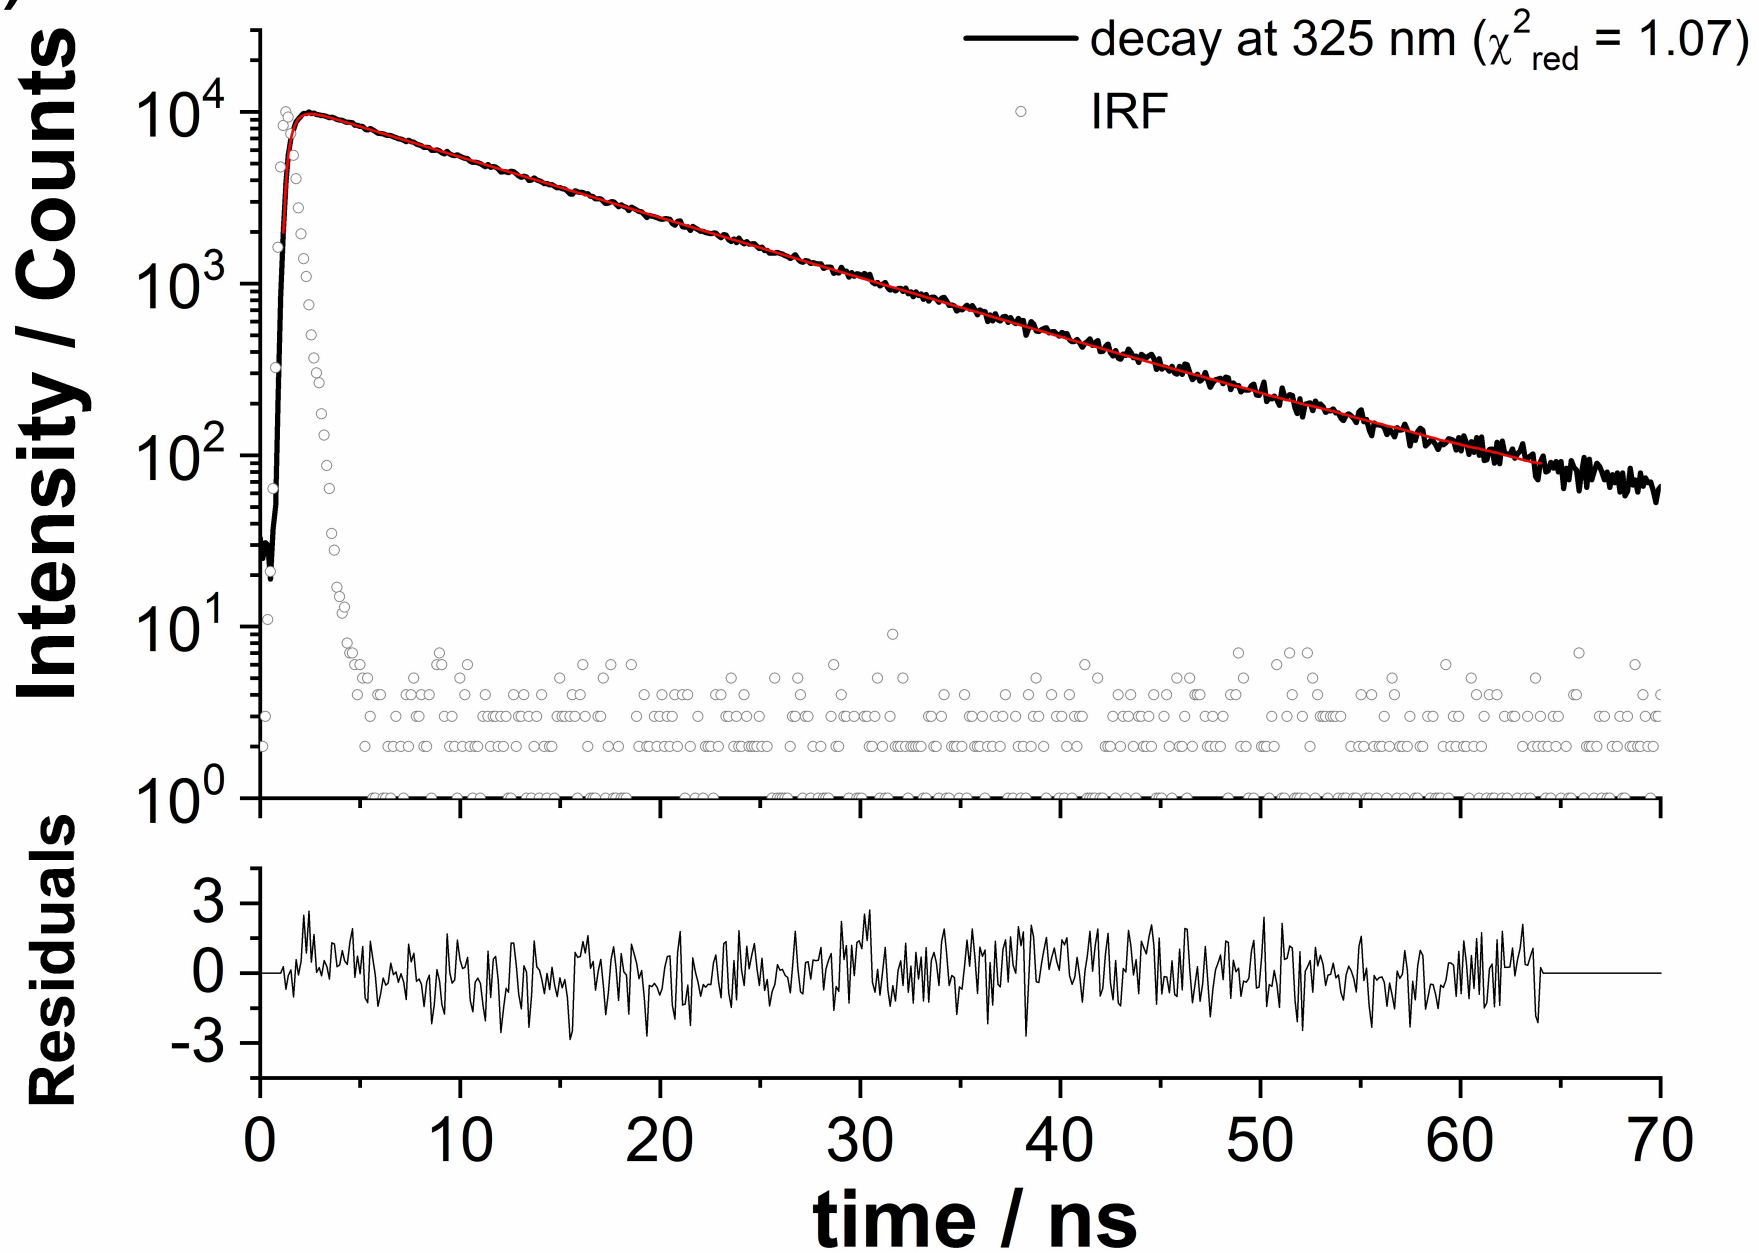

Supplement: c9cp03749g9.pdf [file c9cp03749g9.pdf]
